# Supplementary material
Source: PubMed Central journal article supplement (PMC4837040)
Supplement: NIHMS744012-supplement.pdf [file NIHMS744012-supplement.pdf]

## Additional Diet Questions

**Now I'd like to ask a few additional questions about your usual diet during the past year.**

- 1) In summer, how often did you eat meats, such as hamburgers, steaks, chicken or fish, that were grilled, barbecued or broiled?

times per \_\_\_\_\_

- Day
- Week
- Month
- Year
- Never
- Eaten, don't know how often
- Don't know if eaten

- 2) During the rest of the year, how often did you eat meats such as hamburgers, steaks, chicken or fish that were grilled, barbecued or broiled?

times per \_\_\_\_\_

- Day
- Week
- Month
- Year
- Never
- Eaten, don't know how often
- Don't know if eaten

- 3) When you ate grilled or broiled meats or fish, were they usually very charred, lightly charred, or not charred?

- Very charred     Lightly charred     Not charred     Don't know

4) How often did you eat meats, such as bacon, sausages, hamburgers, steaks, chicken, chops, or fish that were pan fried?

times per \_\_\_\_\_

- Day
- Week
- Month
- Year
- Never
- Eaten, don't know how often
- Don't know if eaten

5) When you ate meat or fish that was pan fried, was it usually very browned, lightly browned, or not browned?

- Very browned
- Not browned
- Lightly browned
- Don't know

6) How often do you eat smoked meats such as bacon, smoked turkey/ham, smoked fish (lox/nova), or smoked brisket?

times per \_\_\_\_\_

- Day
- Week
- Month
- Year
- Never
- Eaten, don't know how often
- Don't know if eaten

7) When you eat a steak or other cooked meat, how do you like it cooked - rare, medium rare, medium, medium well, or well done?

- Rare
- Medium rare
- Medium
- Medium well
- Well done
- Doesn't eat meat
- Don't know

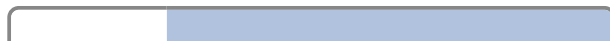

8) How often do you eat foods cooked with garlic?

times per \_\_\_\_\_

- Day
- Week
- Month
- Year
- Never
- Eaten, don't know how often
- Don't know if eaten

9) How often do you eat onions, or foods cooked with onions?

times per \_\_\_\_\_

- Day
- Week
- Month
- Year
- Never
- Eaten, don't know how often
- Don't know if eaten

10) How did you add salt to your food at the table; usually, sometimes, rarely, or never?

- Usually
- Sometimes
- Rarely
- Never
- Don't know

11) Do you or the person who shops for your food check labels to select processed food (e.g. canned) with little or no salt?

- Yes
- No
- Don't know

12) Do you or the person who cooks your meals usually reduce or increase the amount of salt called for in recipes?

- Reduce
- Increase
- Neither

13) How often do you eat foods spiced with Tabasco sauce, chili sauce, red pepper or other hot sauce?

times per \_\_\_\_\_

- Day
- Week
- Month
- Year
- Never
- Eaten, don't know how often
- Don't know if eaten

14) How often did you eat foods containing chocolate, including candy, pastries, ice cream, pudding, hot chocolate, or chocolate milk?

times per \_\_\_\_\_

- Day
- Week
- Month
- Year
- Never
- Eaten, don't know how often
- Don't know if eaten

**Next I'll ask you about coffee and tea consumption. First, I'll ask about coffee. This includes both instant and brewed coffee, either hot or iced. Please also include lattes and espresso.**

15) Did you ever drink at least one cup of coffee per week for six months or longer?

- Yes       No       Don't know

1) At what age did you first drink at least one cup of coffee per week?

\_\_\_\_ Age

2) Do you drink at least one cup of coffee per week now?

- Yes       No       Don't know

3) At what age did you stop drinking at least one cup of coffee per week?

\_\_\_ Age

4) Thinking about the years between age (age in Q14.1) and (age in Q14.3 or now), was there ever a period of one year or more in which you did not drink coffee?

Yes       No       Don't know

5) For how many years in total between age (age in Q14.1) and (now or age in Q14.3) did you not drink coffee?

\_\_\_ Years

**Ask Q14.7 only if subject does not know Q14.1 (age started) or Q14.3 (age stopped).**

6) For about how many years in total did you drink coffee? Please do not include any periods during which you quit drinking coffee.

\_\_\_ Years

7) How many cups of coffee did you usually drink per day or week?

Cups per \_\_\_\_\_  
 Day  
 Week  
 Don't know

8) Did you usually drink caffeinated or decaffeinated coffee?

Caffeinated       Decaffeinated       Don't know

9) Did you usually drink your coffee: **(READ CATEGORIES)**

Cold or iced       Hot       Don't know  
 Warm       Extremely hot

10) Did you usually drink coffee that was strong, medium, or weak?

Strong       Medium       Weak       Don't know

11) Did you usually drink instant coffee, brewed coffee or both equally?

Instant       Brewed       Both equally       Don't know

12) Was the brewed coffee mainly perked, drip, espresso or some other kind?

Perked  
 Drip  
 Espresso (or cappuccino or latte)  
 Other (specify)  
\_\_\_\_\_  
 Don't know

**Now I'll ask about tea, including hot tea, iced tea and herbal tea.**

16) Did you ever drink at least one cup or glass of tea per week for six months or longer?

Yes       No       Don't know

1) At what age did you start drinking at least one cup or glass of tea per week?

\_\_\_ Age

2) Do you drink at least one cup or glass of tea per week now?

Yes       No       Don't know

3) At what age did you stop drinking at least one cup or glass of tea per week?

\_\_\_ Age

4) Thinking about the years between age (age in Q15.1) and (now or age in Q15.3), was there ever a period of one year or more in which you did not drink tea?

Yes       No       Don't know

5) For how many years in total between age (age in Q15.1) and (now or age in Q15.3) did you not drink tea?

\_\_\_ Years

**Ask Q15.6 only if subject does not know Q15.1 (age started) or Q15.3 (age stopped).**

- 6) For about how many years in total did you drink tea? Please do not include any periods during which you quit drinking tea.

\_\_\_ Years

- 7) How many cups or glasses of tea did you usually drink per day or per week?

Cups per \_\_\_\_\_  
 Day  
 Week  
 Don't know

- 8) Did you usually drink your tea: **(READ CATEGORIES)**

Cold or iced       Hot       Don't know  
 Warm       Extremely hot

- 9) When you drank tea, did you usually drink caffeinated tea, decaffeinated tea, herbal tea, green tea, or another type of tea?

Tea from naturally caffeinated tea leaves (not green tea), whether flavored or not  
 Tea from decaffeinated tea leaves (not green tea)  
 Green tea, naturally caffeinated  
 Green tea, decaffeinated  
 Herbal teas, without caffeine  
 Other type, specify:  
\_\_\_\_\_  
 Don't know
